# Supplementary material
Source: Research Square preprint supplement (doi:10.21203/rs.3.rs-8750254/v1)
Supplement: Supplementary file 1 [file 0b67c66ecb904b91961afca7.pdf]

---

## Important Details for the Lumping and Splitting Event (Dec 16th-18th)

---

**From** Tidwell, Caitlin <TidwellC1@archchildrens.org>

**Date** Fri 12/13/2024 1:18 PM

**Cc** Andrew W. Brown <AWBrown@uams.edu>

 1 attachment (361 KB)

Lumping and Splitting Agenda\_12.16 12.18\_Final.pdf;

Hello,

I hope this message finds you well! We're excited to have you join us for the upcoming Lumping and Splitting event from December 16th to December 18th at the Winthrop Rockefeller Institute.

**To help you prepare for the event, I've attached the following important information:**

- Event Agenda
- Airport Arrival & Pick-Up Instructions
- Event Location Map
- Attendee Information
- Background and Orienting Information

As a reminder, please upload any relevant articles or resources you wish to discuss during the event to our shared folder.

**You can access it using the following link:**

<https://app.box.com/s/lhlzty8ss7wy3fgslrg3wz9x0z7u5shw>

Should you have any questions or encounter any issues, please feel free to reach out to me directly at my cell phone: (501) 676-1710. I'm here to help and ensure everything goes smoothly for you.

Thank you again for your time and support in helping make this event a success. We truly appreciate your participation and look forward to seeing you soon!

Best regards,

Caitlin Tidwell

**Caitlin Tidwell, MA**

**Research Program Manager, National Center for Opioid Research & Clinical Effectiveness (NCOR)**

**Arkansas Children's Research Institute**

13 Children's Way • Slot 842 • Little Rock, AR 72202

(501) 364-7374 direct • (501) 676-1710

[Website](#) • [Facebook](#) • [Twitter](#)

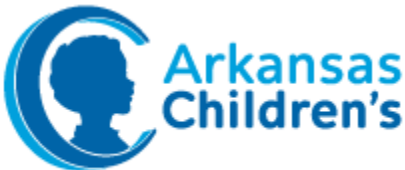

---

This message, including any attachments, may contain confidential and privileged information, including patient information protected by federal and state privacy laws. If you are not the intended recipient, please notify the sender and delete this email and any attachments from your system. Any use, dissemination, distribution or copying of this email by unauthorized persons is prohibited.

**Lumping and Splitting Dialogue Mapping  
Meeting Mon 12/16/2024 - Wed 12/18/2024  
Winthrop Rockefeller Institute**

|                                                                                                                                                          |                                                                                                                                                                        |                                                                                                                                                                                                                                                                            |
|----------------------------------------------------------------------------------------------------------------------------------------------------------|------------------------------------------------------------------------------------------------------------------------------------------------------------------------|----------------------------------------------------------------------------------------------------------------------------------------------------------------------------------------------------------------------------------------------------------------------------|
| <p><b><u>Accommodations:</u></b></p> <p>Winthrop Rockefeller Institute (WRI)<br/>1 Rockefeller Drive<br/>Morrilton, Arkansas<br/><br/>(501) 727-5435</p> | <p><b><u>Hotel Contact:</u></b></p> <p>Carter Wagner<br/><a href="mailto:CWagner@rockefellerinstitute.org">CWagner@rockefellerinstitute.org</a><br/>(501) 727-5242</p> | <p><b><u>On-site Contact:</u></b></p> <p>Caitlin Tidwell<br/><a href="mailto:TidwellC1@archildrens.org">TidwellC1@archildrens.org</a><br/>Cell: 501-676-1710<br/><br/>Andrew Brown<br/><a href="mailto:AWBrown@uams.edu">AWBrown@uams.edu</a><br/>Cell: (319) 350-9401</p> |
|----------------------------------------------------------------------------------------------------------------------------------------------------------|------------------------------------------------------------------------------------------------------------------------------------------------------------------------|----------------------------------------------------------------------------------------------------------------------------------------------------------------------------------------------------------------------------------------------------------------------------|

**Attendees:** Sabrina Ayoub-Charette, Andrew Brown, Laura Chiavaroli, David Church, Alexandra Cowan, Josh Erndt-Marino, Kelly Higgins, Andrew Keitt, Caitlin Tidwell, Colby Vorland

|                                                       |                                                                                                                                                                      |
|-------------------------------------------------------|----------------------------------------------------------------------------------------------------------------------------------------------------------------------|
| <p><b>Monday 12/16</b></p> <p>10:30 AM to 2:30 PM</p> | <ul style="list-style-type: none"> <li>• Airport Pickup</li> <li>• Lunch <i>[catered by RX Catering]</i></li> </ul>                                                  |
| <p>3:00 PM to 6:30 PM</p>                             | <ul style="list-style-type: none"> <li>• <b>Event Transportation:</b> Leave Arkansas Children’s Hospital (ACH) and drive to WRI</li> <li>• Event Check In</li> </ul> |
| <p>6:30 PM to 9:00 PM</p>                             | <ul style="list-style-type: none"> <li>• Dinner <i>[catered by WRI]</i></li> <li>• Networking &amp; S’mores</li> </ul>                                               |

|                                                       |                                                                                                                        |
|-------------------------------------------------------|------------------------------------------------------------------------------------------------------------------------|
| <p><b>Tuesday 12/17</b></p> <p>7:30 AM to 8:00 AM</p> | <ul style="list-style-type: none"> <li>• Breakfast <i>[catered by WRI]</i></li> </ul>                                  |
| <p>8:00 AM to 10:00 PM</p>                            | <ul style="list-style-type: none"> <li>• Session 1</li> </ul>                                                          |
| <p>10:00 AM to 10:30 AM</p>                           | <ul style="list-style-type: none"> <li>• Break/Snacks <i>[catered by WRI]</i></li> </ul>                               |
| <p>10:30 AM to Noon</p>                               | <ul style="list-style-type: none"> <li>• Session 2</li> </ul>                                                          |
| <p>Noon to 1:00 PM</p>                                | <ul style="list-style-type: none"> <li>• Lunch <i>[catered by WRI]</i></li> </ul>                                      |
| <p>1:00 PM to 2:30 PM</p>                             | <ul style="list-style-type: none"> <li>• Session 3</li> </ul>                                                          |
| <p>2:30 PM to 3:00 PM</p>                             | <ul style="list-style-type: none"> <li>• Break/Snacks <i>[catered by WRI]</i></li> </ul>                               |
| <p>3:00 PM to 5:00 PM</p>                             | <ul style="list-style-type: none"> <li>• Session 4</li> <li>• Wrap up and Next Steps</li> </ul>                        |
| <p>5:30 PM to 6:30 PM</p>                             | <ul style="list-style-type: none"> <li>• Group Activity (Optional)</li> </ul>                                          |
| <p>6:30 PM to 9:00 PM</p>                             | <ul style="list-style-type: none"> <li>• Dinner <i>[catered by WRI]</i></li> <li>• Networking &amp; S’mores</li> </ul> |

|                                                         |                                                                                                                  |
|---------------------------------------------------------|------------------------------------------------------------------------------------------------------------------|
| <p><b>Wednesday 12/18</b></p> <p>7:00 AM to 8:00 AM</p> | <ul style="list-style-type: none"> <li>• Breakfast</li> </ul>                                                    |
| <p>8:00 AM to Noon</p>                                  | <ul style="list-style-type: none"> <li>• <b>Transportation:</b> Leave WRI and begin airport drop off.</li> </ul> |

## Airport Arrival Instructions:

- After exiting your plane, follow the overhead signs to the **Baggage Claim** area.
- The **exit** is located near the **Baggage Claim** area.
- Once you arrive, please call **Caitlin Tidwell** at **(501) 676-1710** to discuss which exit door you should use.

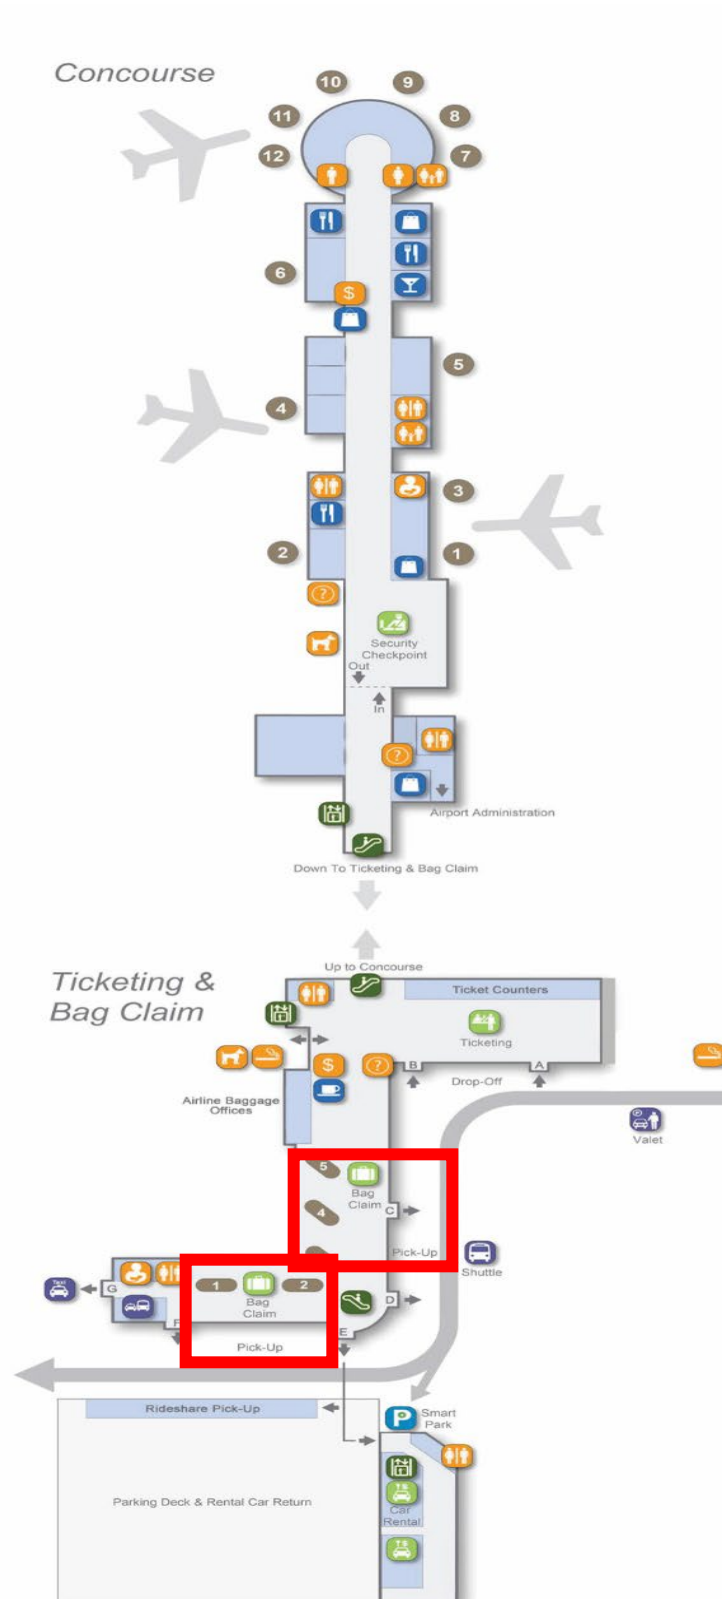

## Winthrop Rockefeller Institute:

- **Check-In:** Please be ready to provide your name and a corresponding government-issued ID upon check-in.
- **Accommodation:** Attendees will be staying in the President's Lodge.
- **Mapping Sessions:** These will be hosted in the Petit Jean I conference space.
- **Dining:** Meals will be served in the Main Building West.

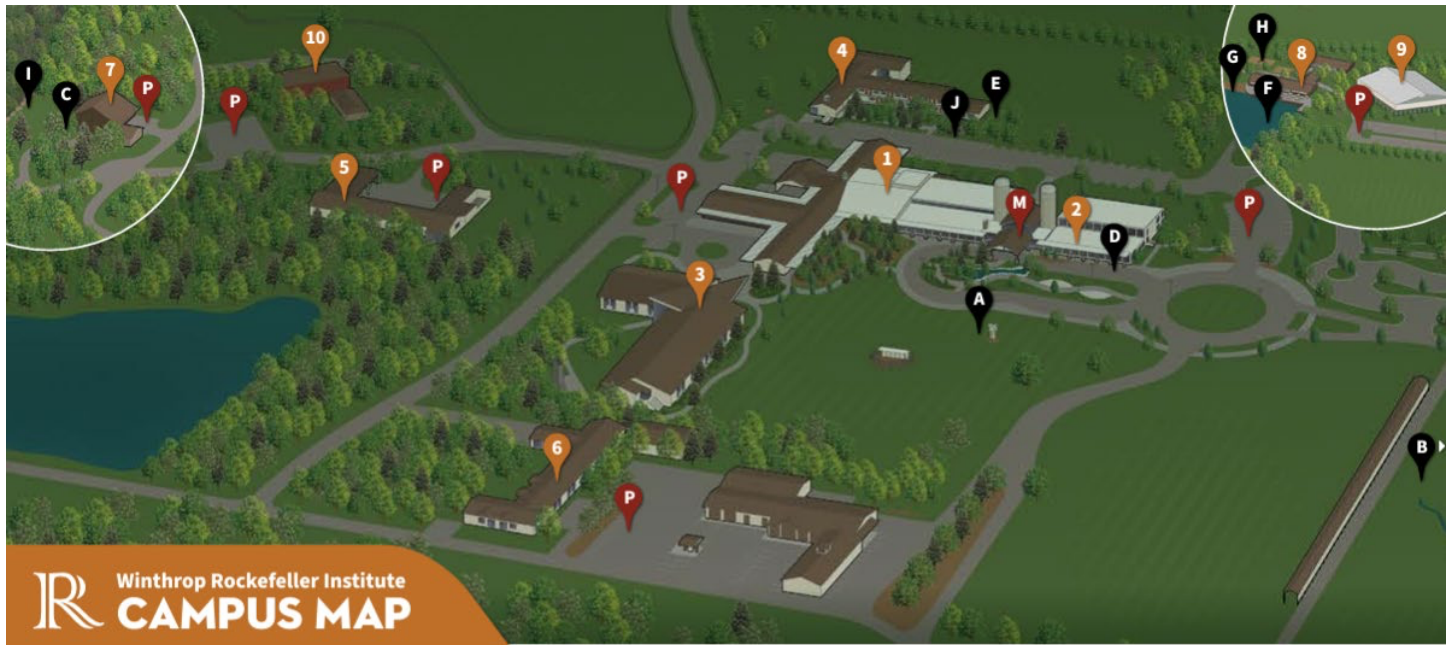

### INSTITUTE BUILDINGS

- |                                                                        |                        |
|------------------------------------------------------------------------|------------------------|
| 1 Main Building West<br>⊙ Conference & Dining Rooms                    | 6 The Grove Apartments |
| 2 Main Building East<br>⊙ Legacy Gallery & Theater<br>⊙ The Roustabout | 7 The Studio           |
| 3 President's Lodge                                                    | 8 Boathouse            |
| 4 The Meadows                                                          | 9 Tennis Court         |
| 5 The Orchard                                                          | 10 Fitness Center      |

### GUEST AMENITIES

- |                           |                       |
|---------------------------|-----------------------|
| A Water as Needed         | F Lake Abby           |
| B Plowing the Troposphere | G Fishing*            |
| C Visibility: Unlimited   | H Horseshoes*         |
| D Bicycles*               | I Studio Overlook     |
| E Bocce Ball              | J EV Charging Station |

### PLEASE NOTE

- |                 |
|-----------------|
| M Main Entrance |
| P Parking       |

\* Please inquire at the Front Desk.

**Host and Liaison:**

**Andrew Brown, PhD, FTOS**

Department of Biostatistics, University of Arkansas for Medical Sciences  
Biostatistics Core Director, Center for Childhood Obesity Prevention, Arkansas Children's Research Institute  
[AWBrown@uams.edu](mailto:AWBrown@uams.edu)

**Dialogue Mapping Facilitator:**

**Andrew Keitt, PhD**

History, University of Alabama at Birmingham  
[akeitt@uab.edu](mailto:akeitt@uab.edu)

**Panelists:**

**Laura Chiavaroli, MSc, PhD**

Nutritional Science, University of Toronto  
[sabrina.ayoubcharette@mail.utoronto.ca](mailto:sabrina.ayoubcharette@mail.utoronto.ca)

**Alexandra Cowan-Pyle, PhD**

Nutritional Epidemiologist, Texas A&M Institute for Advancing Health Through Agriculture  
[alexandra.cowan@ag.tamu.edu](mailto:alexandra.cowan@ag.tamu.edu)

**Josh Erndt-Marino, PhD**

Bespoke Analytics  
[josh.marino2@gmail.com](mailto:josh.marino2@gmail.com)

**Kelly Higgins, PhD**

Chemical Regulation and Food Safety, Exponent  
[khiggins@exponent.com](mailto:khiggins@exponent.com)

**Colby Vorland, PhD**

Indiana University School of Public Health-Bloomington  
[cvorland@iu.edu](mailto:cvorland@iu.edu)

**Scientific Support:**

**Sabrina Ayoub-Charette**

Nutritional Science, University of Toronto  
[sabrina.ayoubcharette@mail.utoronto.ca](mailto:sabrina.ayoubcharette@mail.utoronto.ca)

**Observer:**

**David Church, PhD**

Institute on Aging, University of Arkansas for Medical Sciences  
[DChurch@uams.edu](mailto:DChurch@uams.edu)

**Administrative Support:**

**Caitlin Tidwell, MA**

National Center for Opioid Research & Clinical Effectiveness (NCOR), Arkansas Children's Research Institute  
[TidwellC1@archchildrens.org](mailto:TidwellC1@archchildrens.org)

## Background and Orienting Information

“People don’t eat nutrients; they eat food,” so a common saying goes. Yet, when asked which foods to eat, people commonly define target foods by their nutrients. This problem of lumping (defined here as aggregating certain elements of diet, such as nutrients, foods, or food categories) versus splitting (defined herein as disaggregating those elements into individual or different parts) extends to foods in dietary patterns, as well. “Red and processed meat” is a common example of ‘lumping’ that some scientists find untenable because various meat sources have varied nutrient profiles, and meat is substantively different than processed meats. The slogan “Pork. The Other White Meat” embodies perceptions about the inadequacy of red meat as a singular category. Others argue that red and processed meats should be considered together given common nutrients across animal products, with some plant-based diet indices including all animal products in a negative category. Which categorization approaches (if any) are correct, and for what purposes?

The methods, logic, history, and future of lumping and splitting approaches for scientific and public health purposes are many, and need to be articulated carefully to enable evidence generators and users to more clearly define at least two questions: “What nutrition-related question is being asked?” and “For what purpose?” The usual debates, publications, and methodological investigations do not capture the rich set of thoughts on the past, present, and future of how to decide which foods to consider as a category for different health-related goals.

**Objectives:** To bring together a group of investigators to 1) evaluate strengths and limitations of existing approaches to lumping and splitting; 2) discuss proposed and evolving approaches; and 3) assess which concepts are or are not generally agreed upon, and which ones may ultimately be scientifically unanswerable.

**Approach and Scope:** In a one-day, in-person meeting, we will engage in a facilitated discussion regarding lumping and splitting, using pork as a nucleating but not limiting focus. Discussion points will be assessed for whether they do or do not have scientific agreement; or are ostensibly impossible for scientific consensus to exist (e.g., questions of morals, ethics, or preferences). The proposed project will use a narrative approach (Science Dialogue Mapping), to assess a broad set of topics thematically as the meeting progresses. A 3.5 minute video of the dialogue mapping process can be viewed here:

<https://www.youtube.com/watch?v=pxS5wUljfjE> An example of a dialogue map related to dairy and health can be viewed here: <https://dx.doi.org/10.5967/2nxz-f171>

**Preliminary Central Themes** for the discussion include:

- For what purposes is it appropriate to lump nutrients, foods, or diets into (or split them apart from) various categories?
- What approaches are most appropriate to lump or split nutrients, foods, or diets for these purposes?
- What, if any, new methods need to be developed to accomplish these purposes?

See the ‘Asking Good Questions’ primer in the pre-meeting materials. The prompts may change with input from the panelists, and one of these themes may organically arise in discussing another theme.

As illustrative examples, discussions and disagreements may be considered around topics such as nutrients found in pork, definitions of pork and pork-containing foods, lumping or splitting of various types of pork into animal-food categories such as red or red and processed meats, and dietary patterns incorporating pork. The emphasis is on lumping and splitting broadly, and this example should not be considered a restriction of concepts related to lumping and splitting of nutrients, foods, or diets as it applies to human health. Anticipated topics may include whether and how the method of dietary assessment is important; contrasts among culinary, biological, and cultural distinctions; what makes an approach “good enough” and “good enough for what purpose”; how complex dietary patterns may be used to impugn or exonerate foods; and the impact of regulatory standards of identity, among others. Discussions will tie back to how these considerations are relevant to human health in response to consuming nutrients, foods, or diets to make the scope tractable, while acknowledging that other or broader perspectives may be important (e.g., ethics or environment).

## **Roles:**

**The Host and Liaison** will serve to oversee the event, coordinate interpretation of the discussion to the Dialogue Mapping Facilitator, and prompt with additional suggestions to keep the discussion going. In general, the Host and Liaison will allow the discussion to unfold without undue influence on its direction or focus.

**Dialogue Mapping Facilitator** will translate the discussion from open ideas to mapped concepts, including asking clarifying and refining questions.

**Panelists** will discuss the topic at hand and contribute ideas, questions, points, counterpoints, clarifications, evidence, and in other ways unpack the objective.

**The Scientific Support** will help to document the meeting, identify scientific publications and other documentation to support concepts, locate references mentioned by the panelists, and in other ways undergird the scientific basis of the discussion in a way that helps panelists focus. The Scientific Support may also make suggestions, comments, or provide resources and references relevant to the discussion.

**The Observer** will watch the discussion and be allowed to take any notes to share with the funder as desired. The observer will not participate in the dialogue mapping process, will not be a coauthor on resulting manuscripts, and will not have editorial authority over resulting presentations and manuscripts. The Observer's participation will be acknowledged in publication(s) resulting from the event.

**Administrative Support** will provide or arrange technological support as needed, record the meeting for internal use related to the mapping, answer and solve logistical questions related to the event, and otherwise ensure that the meeting will run smoothly.

**Conduct:** The strength of dialogue mapping is its collaborative process rather than a debate. All perspectives are welcomed, and panelists should feel comfortable asking questions or making comments, even if they are not confident in the veracity or answer. The mapping approach allows concepts to be heard and documented, but it also permits determining when a topic has been thoroughly documented. If a perspective has been sufficiently discussed, panelists should be ready to move on to something new and not belabor points that have already been mapped.

Participants must pledge to only use electronic devices explicitly for the purposes of this panel during the dialogue mapping session, e.g. looking up a reference or website. There will be periodic breaks when panelists may make phone calls and check email.

**Attire:** Work casual.

**Subsequent steps:** After the meeting, the map will be clarified and refined. Thereafter, a panel of to-be-identified mid-career to senior experts in the field will be asked to provide their perspectives on the map and the concepts identified therein. Attendees of the dialogue mapping event will be asked to suggest experts to serve in this role, reflecting on the topics that emerged while constructing the dialogue map. Meeting presentations and publications will be drafted, consistent with ICMJE guidance and details articulated in the meeting agreement.
